# Supplementary material
Source: publisher site journal article supplement (https://www.dovepress.com/article/428960)
Supplement: Supplementary file 1 [file get_supplementary_file.php]

# Supplementary Table 1

**Table 1** Per-patient visualisations

**Legend**

- COPD exacerbation
- CHF flare-up
- ANX flare-up
- DEP flare-up
- End/loss of follow-up
- Death

| Patient ID | Baseline comorbidities | AECOPD and/or comorbid flare-up pattern              |
|------------|------------------------|------------------------------------------------------|
| 1          | ANX, DEP               | <p style="text-align: center;">Days of follow-up</p> |
| 2          | CHF                    | <p style="text-align: center;">Days of follow-up</p> |
| 3          | DEP                    | <p style="text-align: center;">Days of follow-up</p> |
| 4          | ANX, DEP, DM           | <p style="text-align: center;">Days of follow-up</p> |

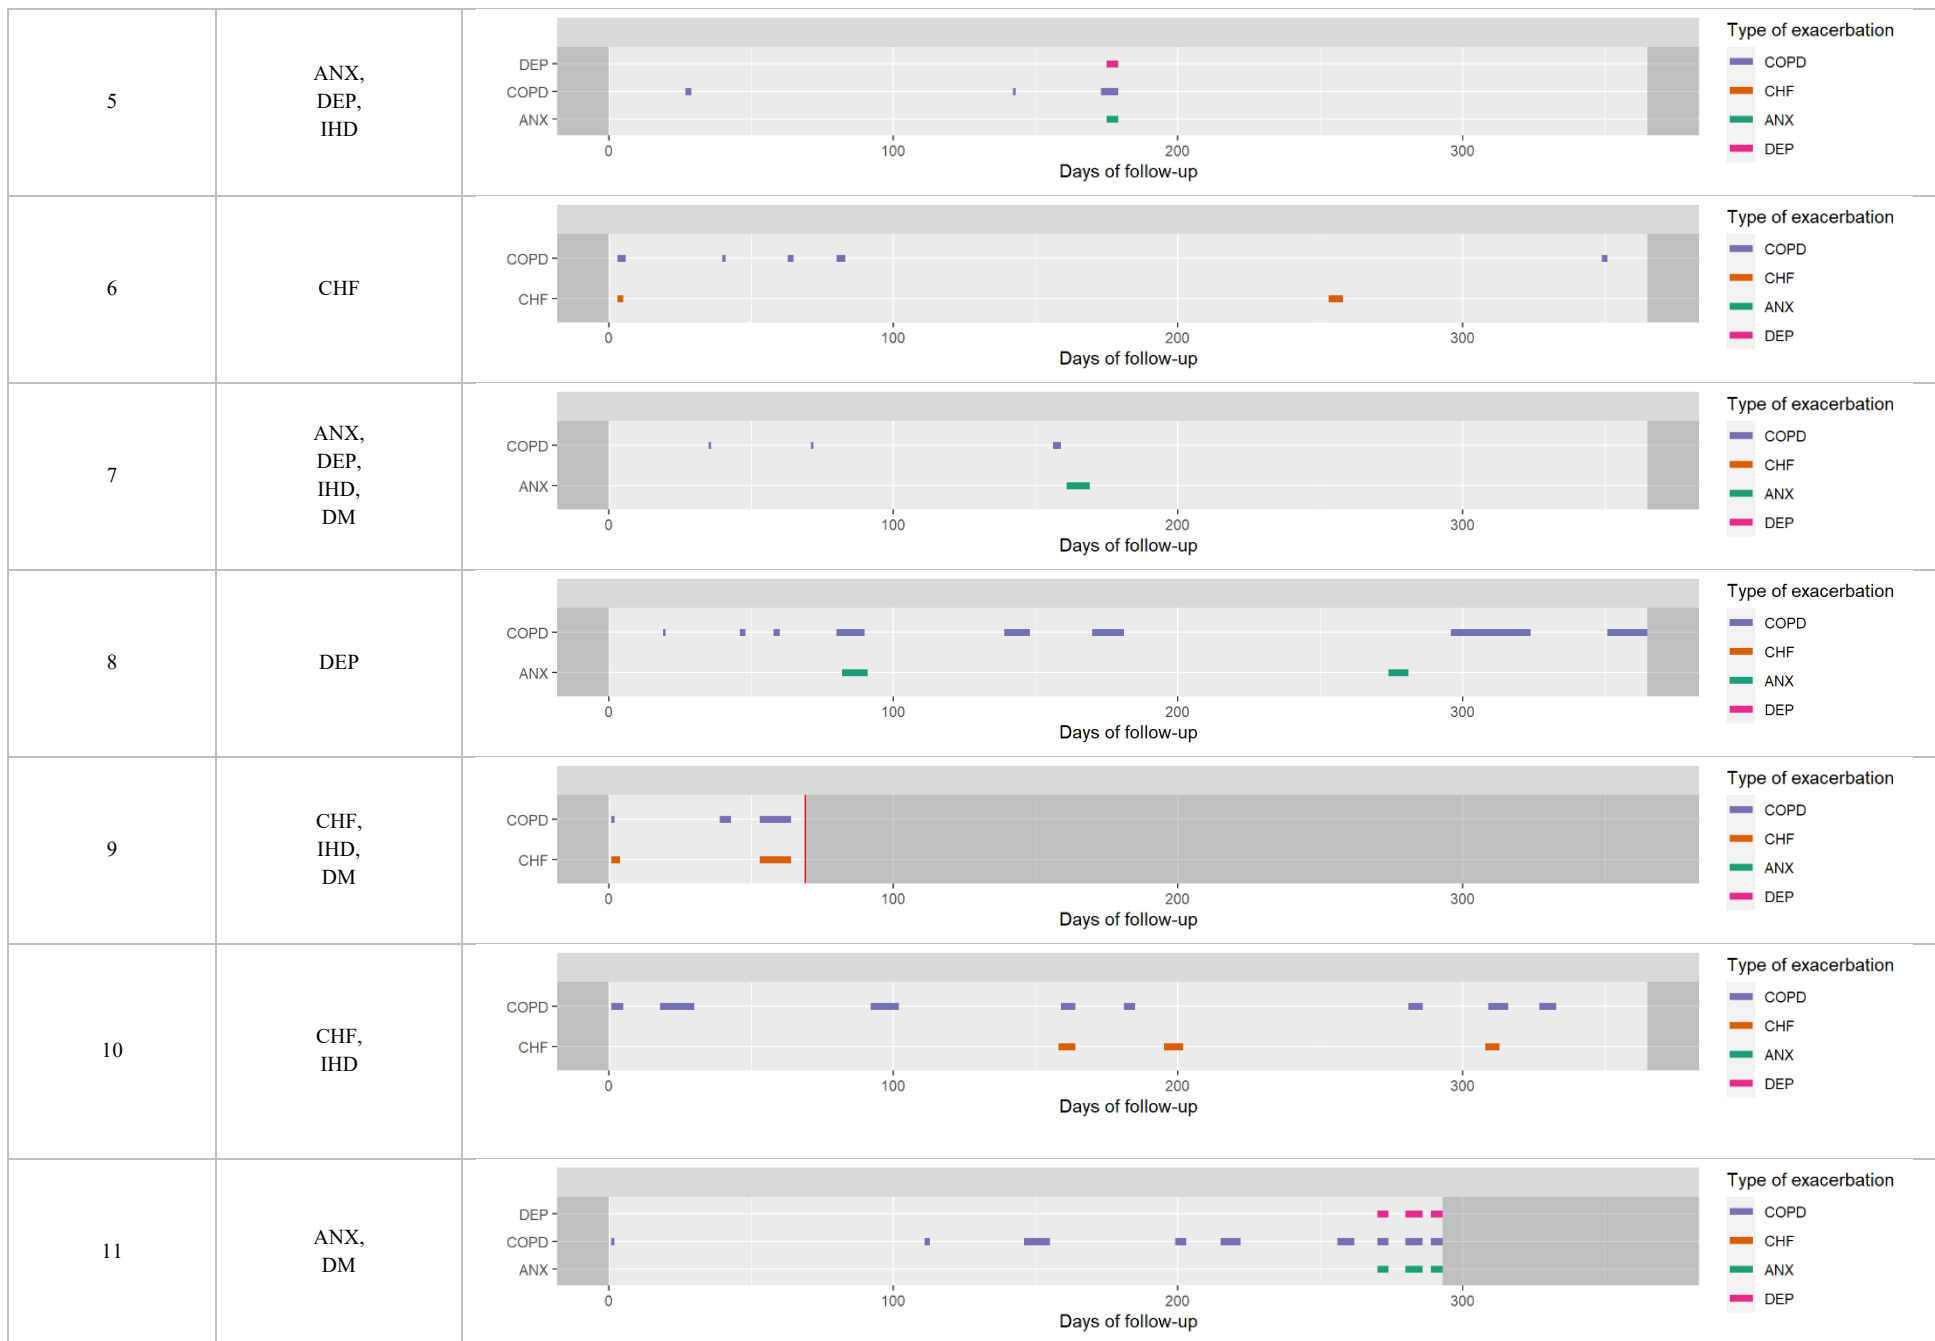

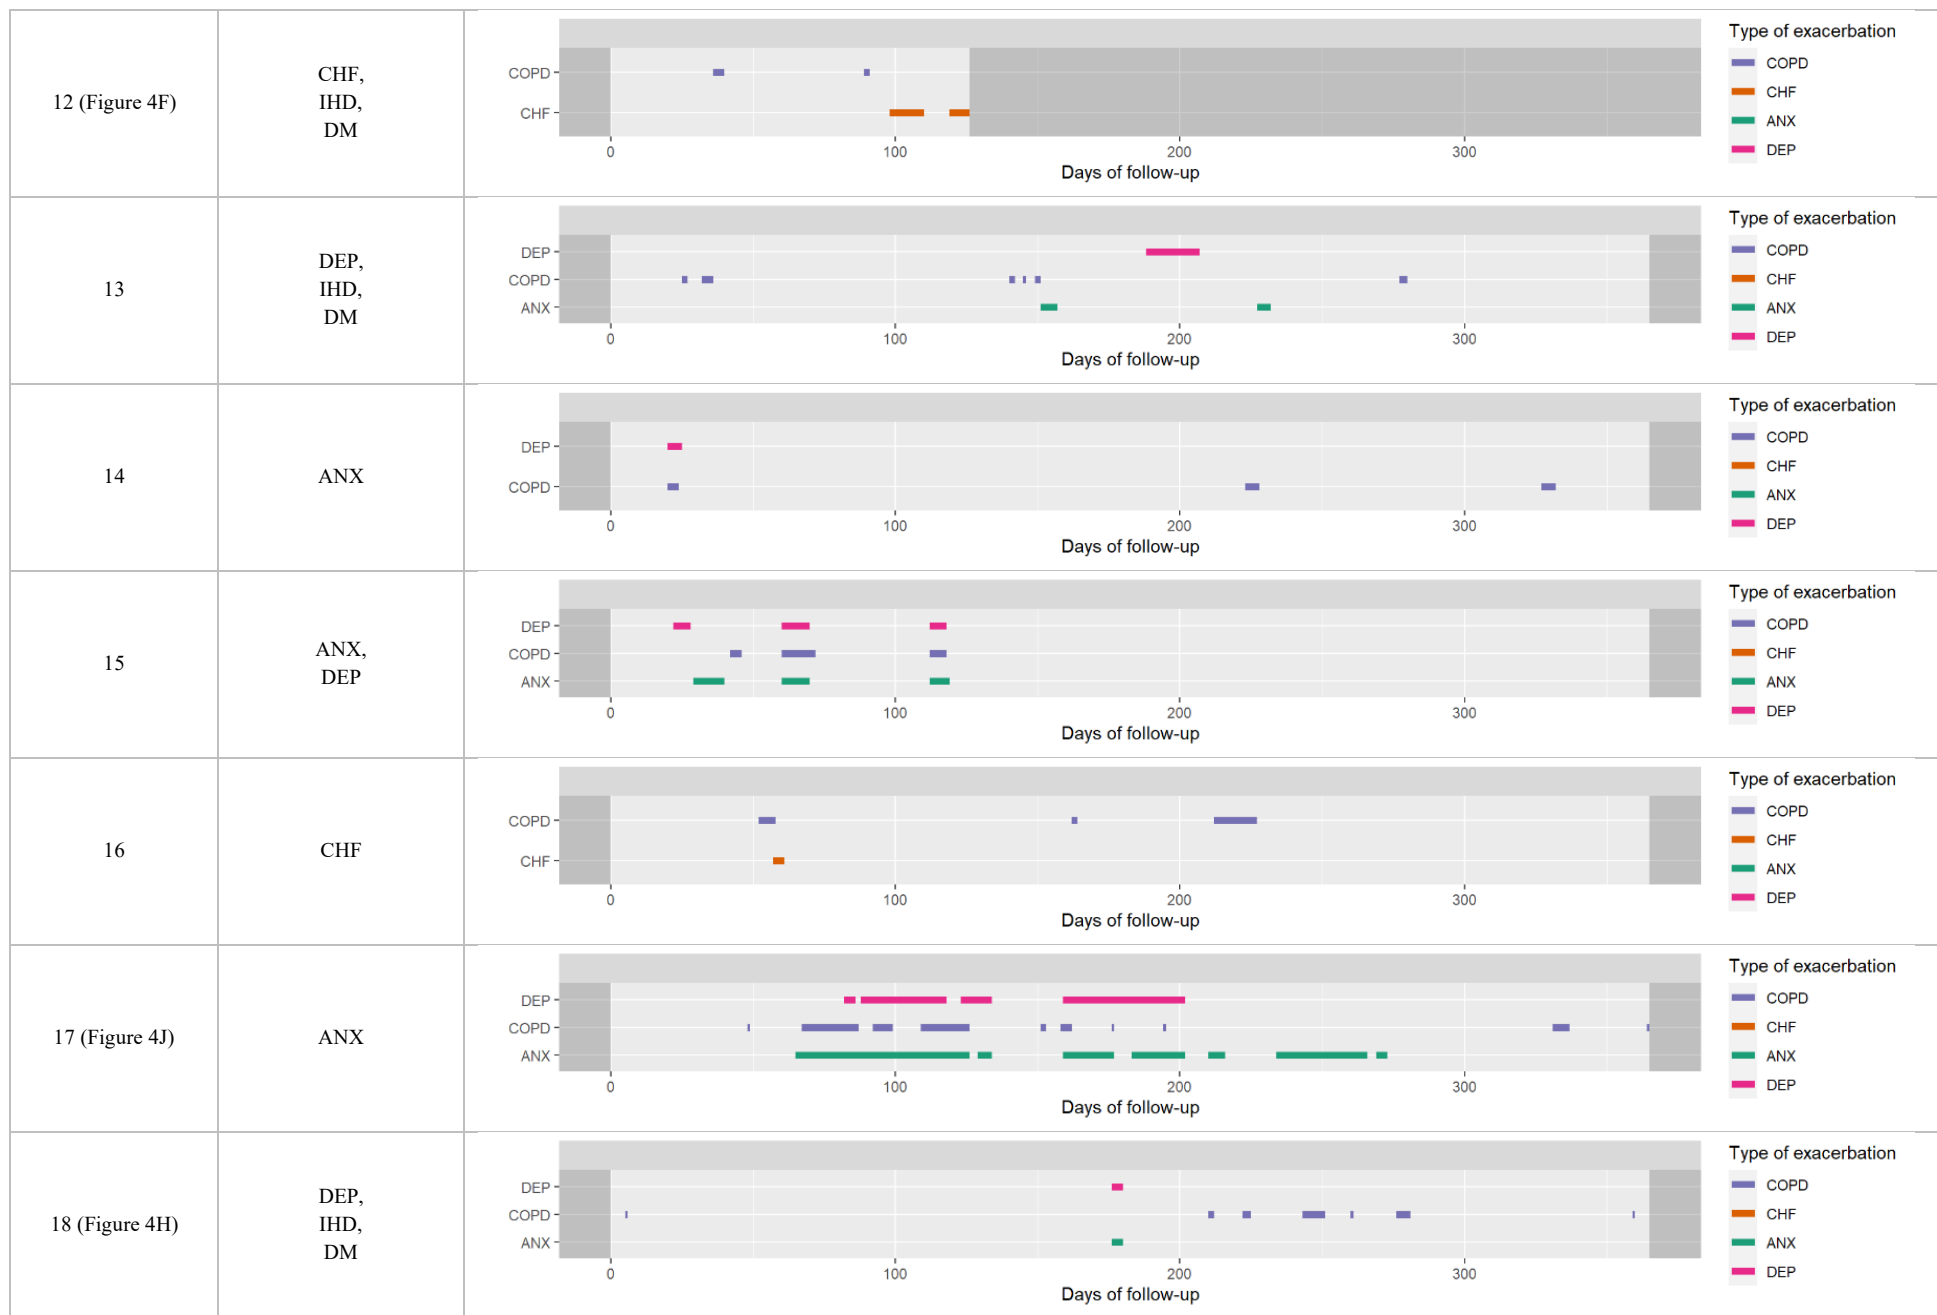

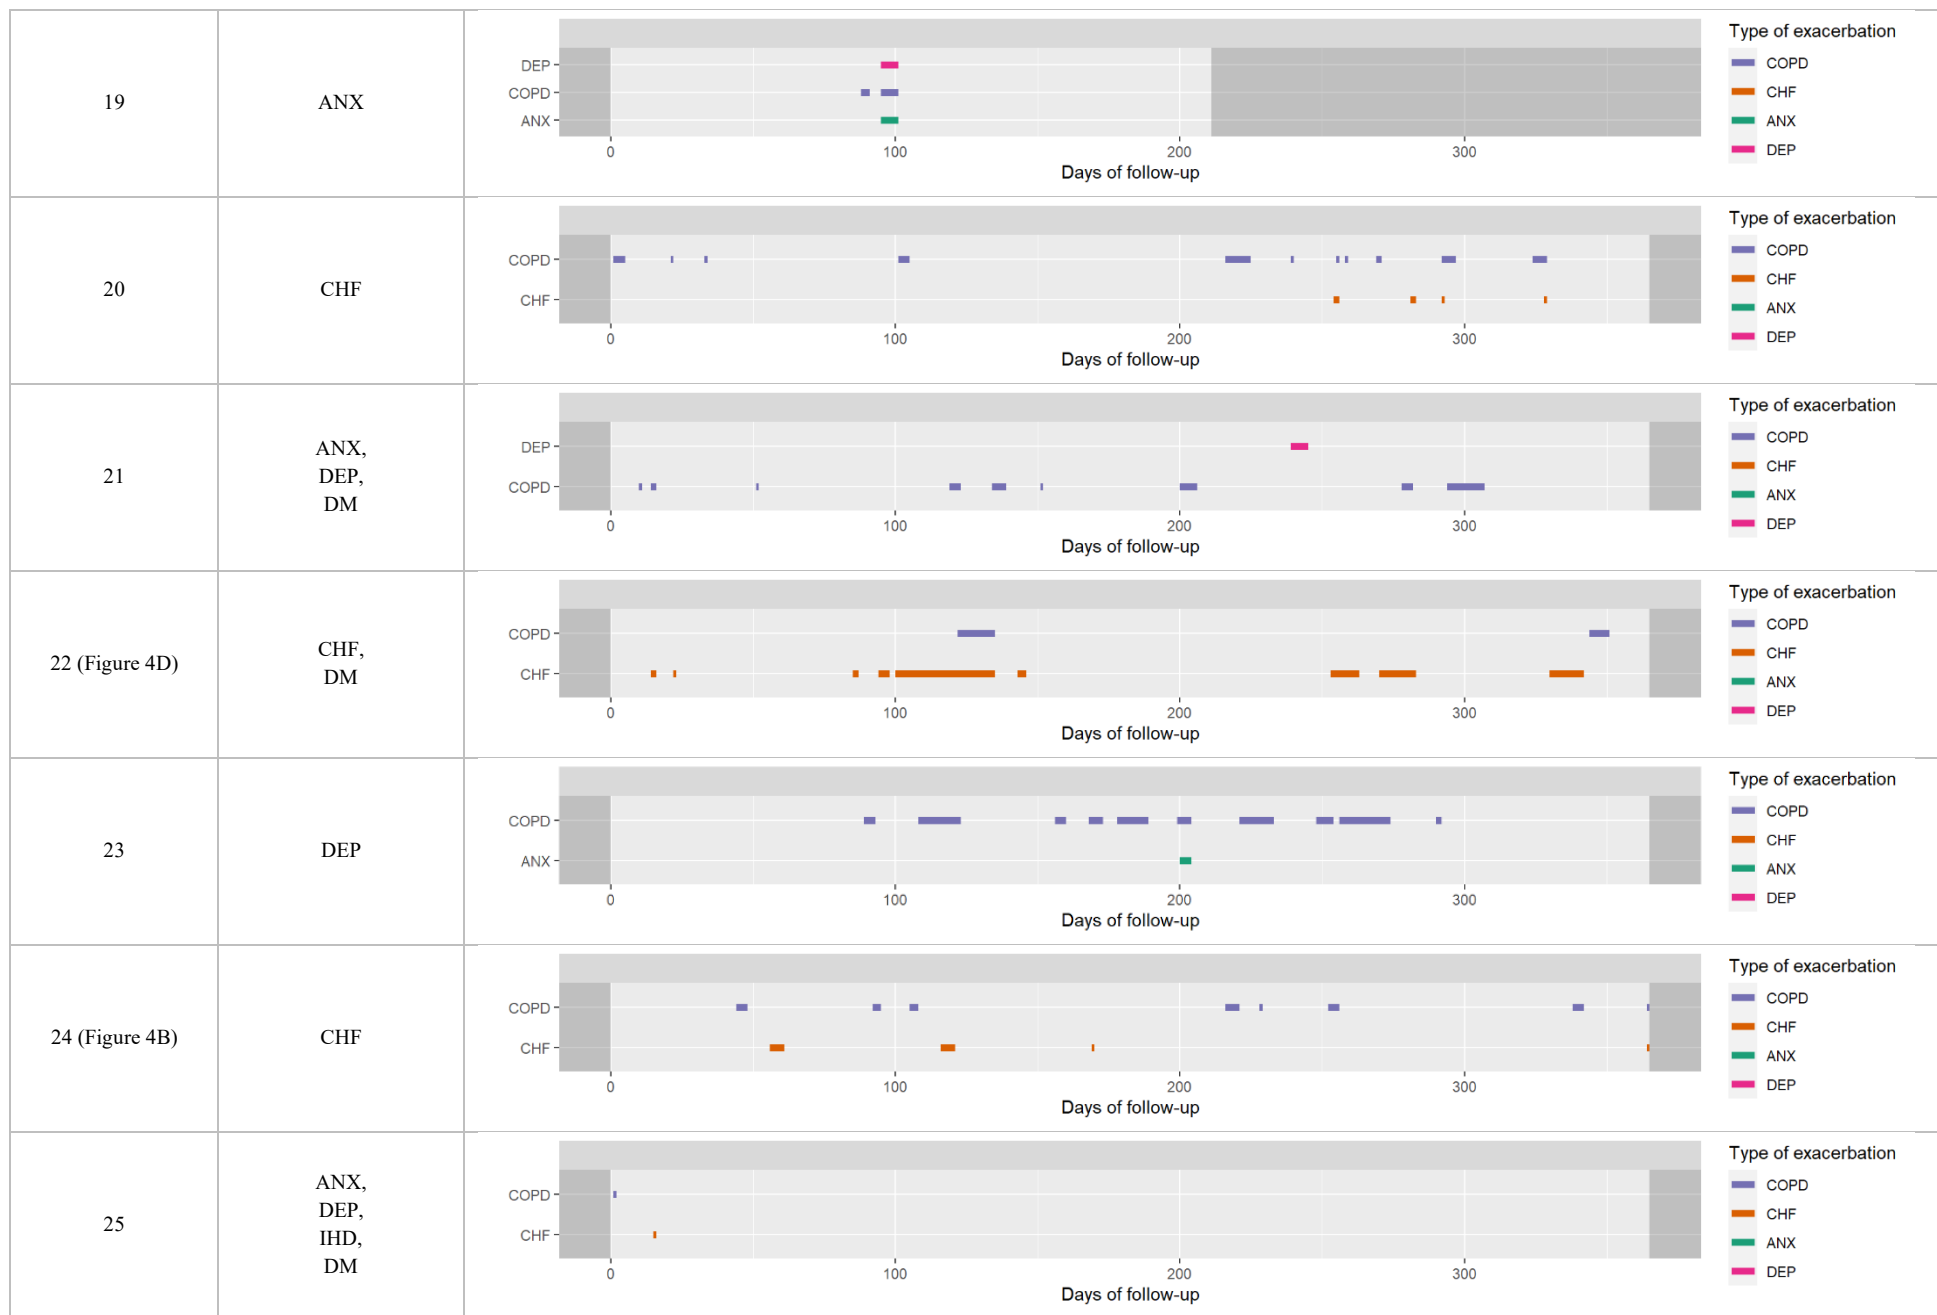

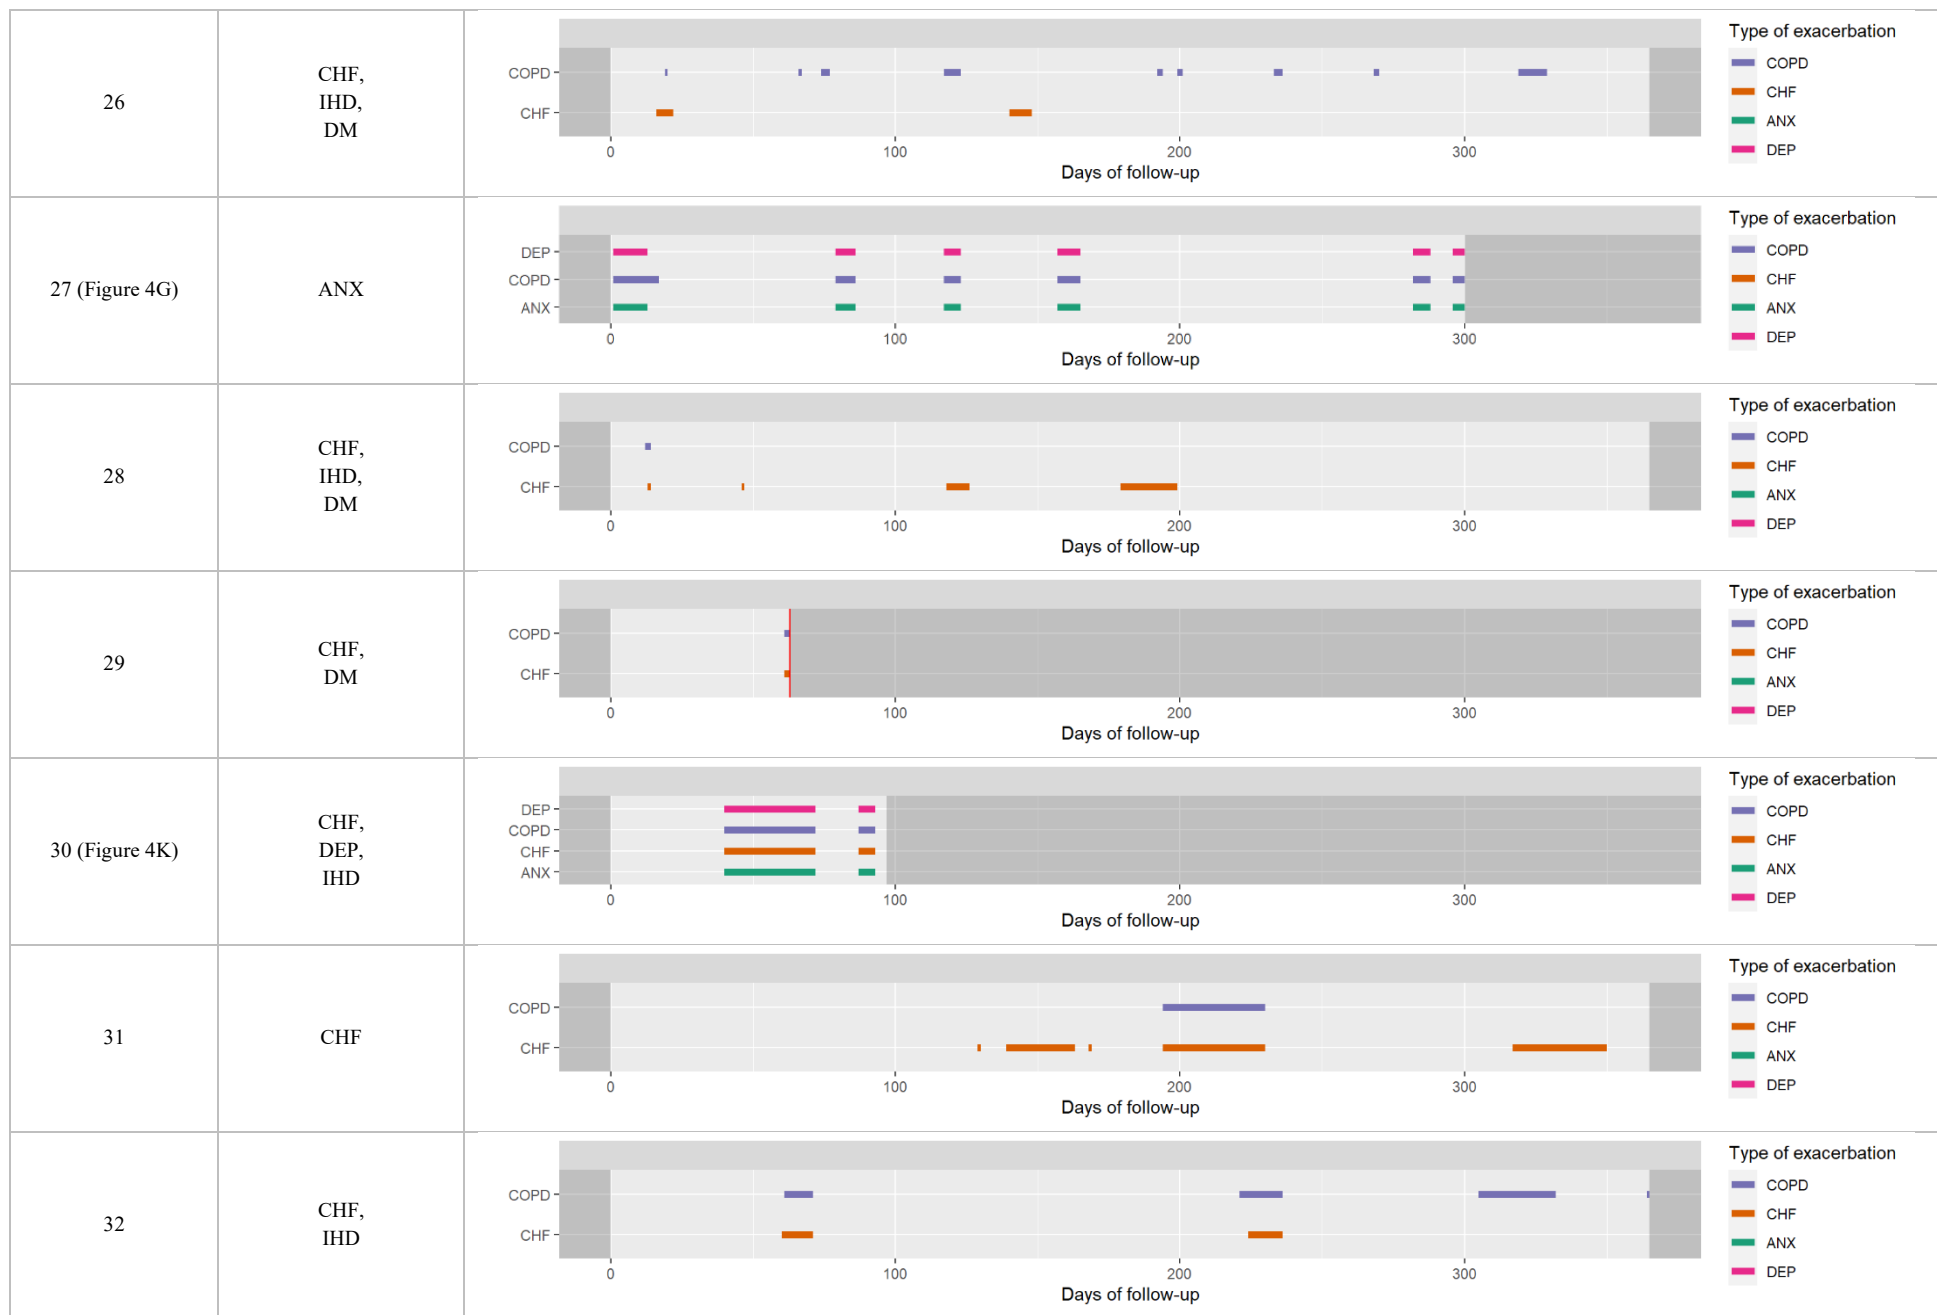

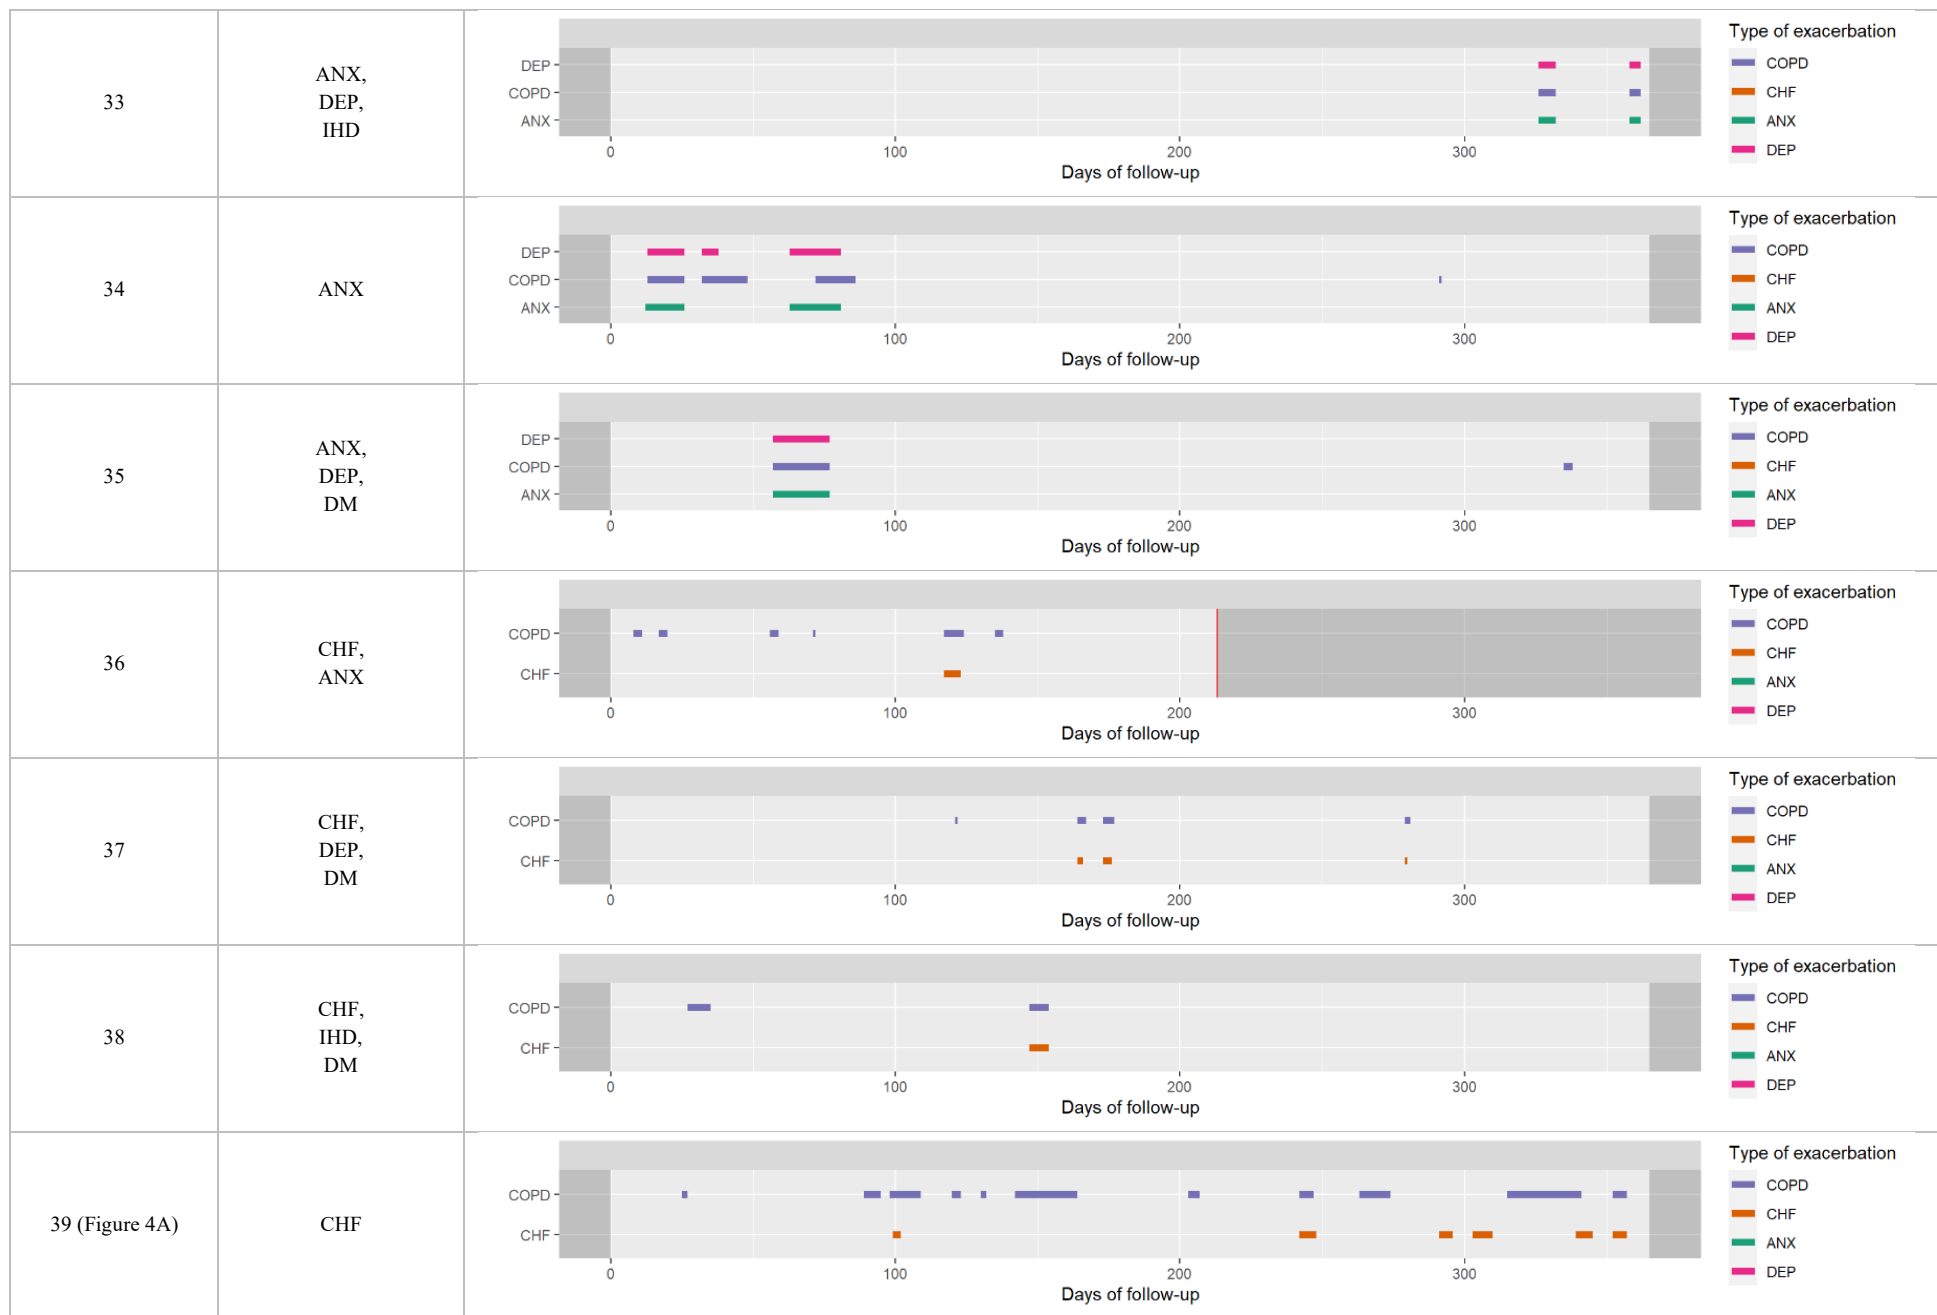

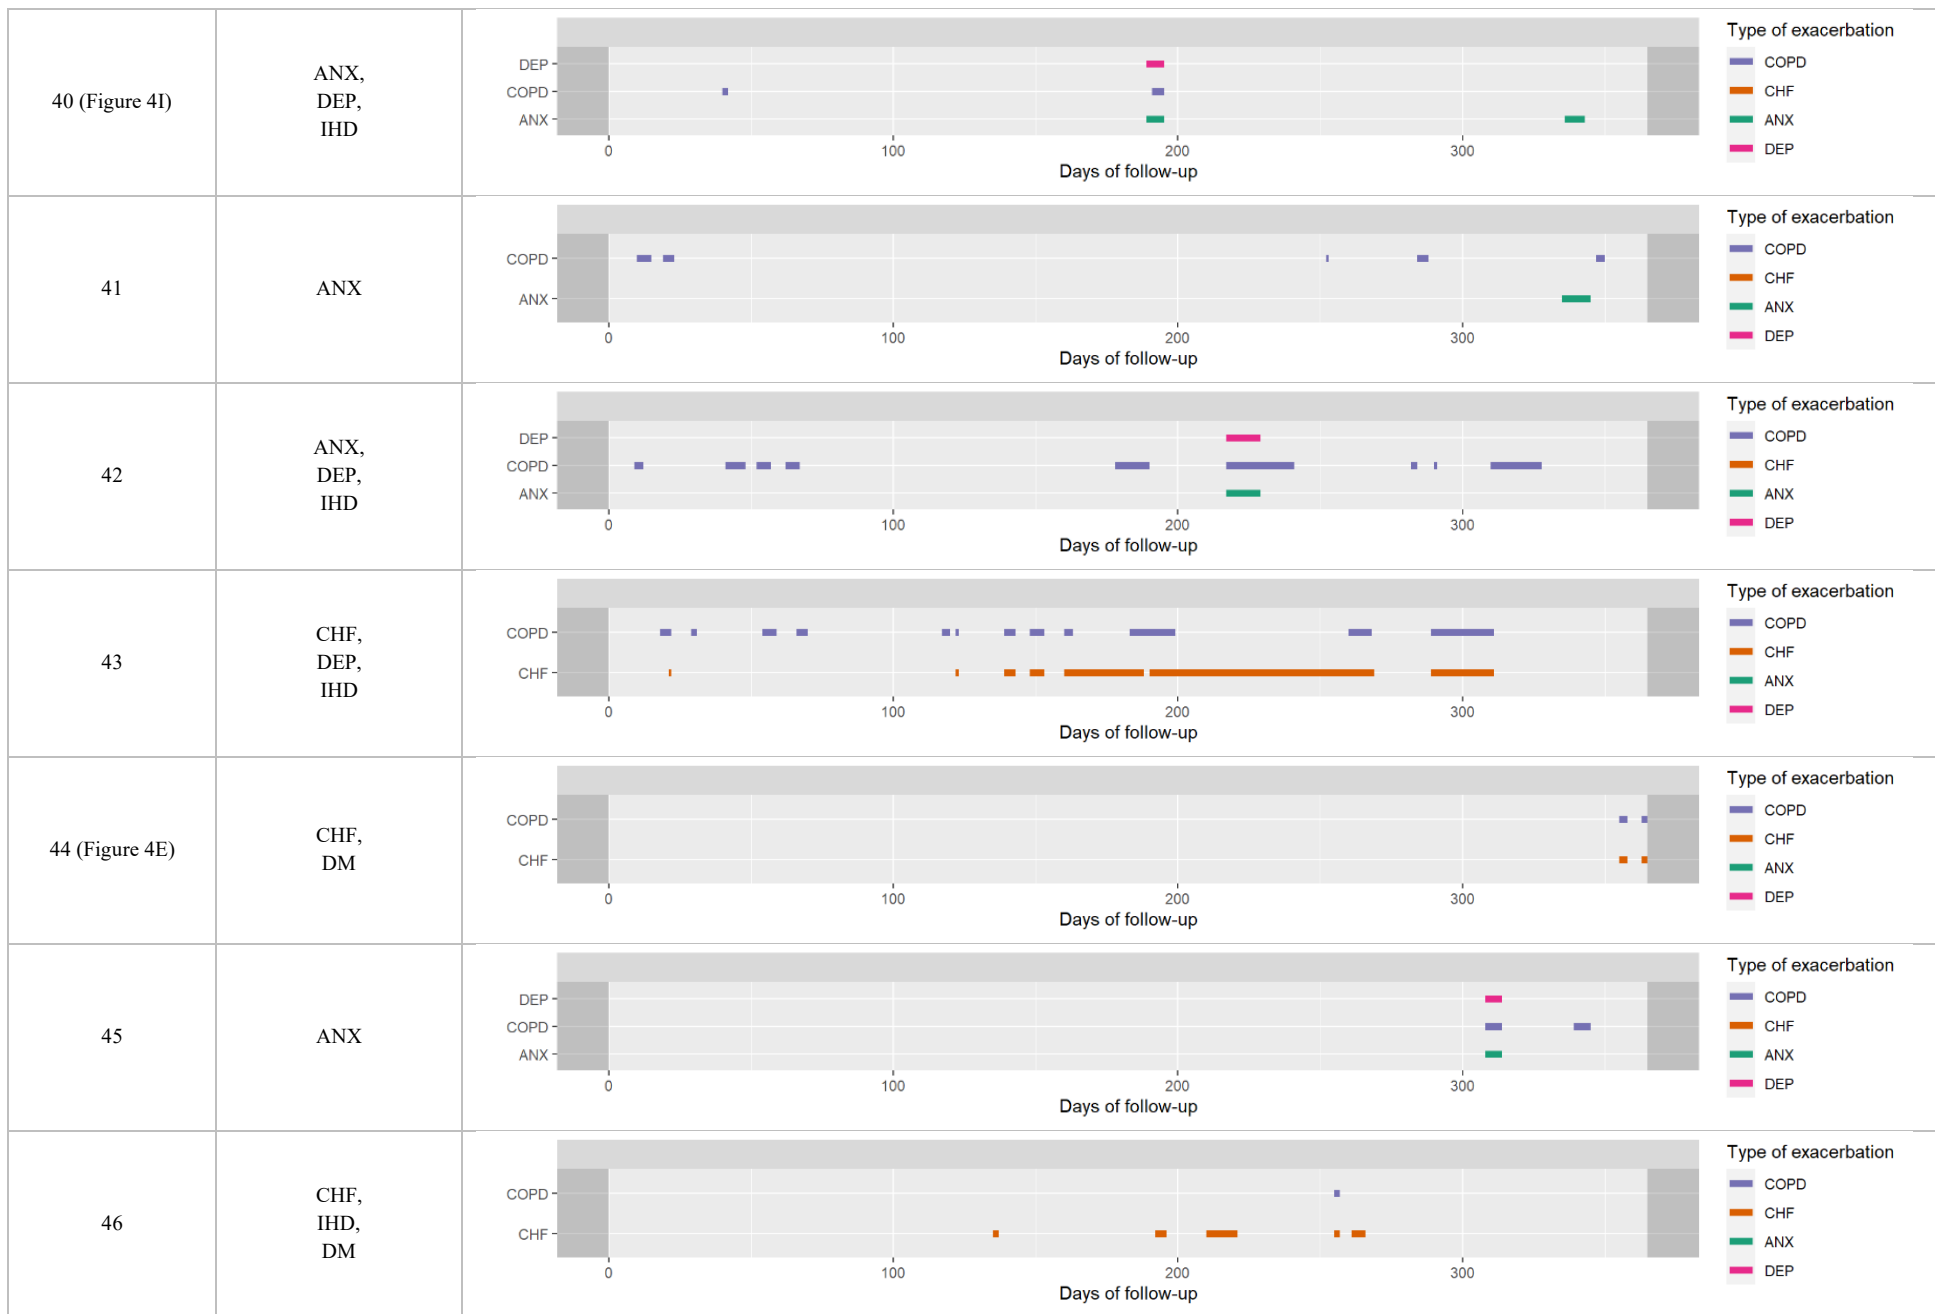

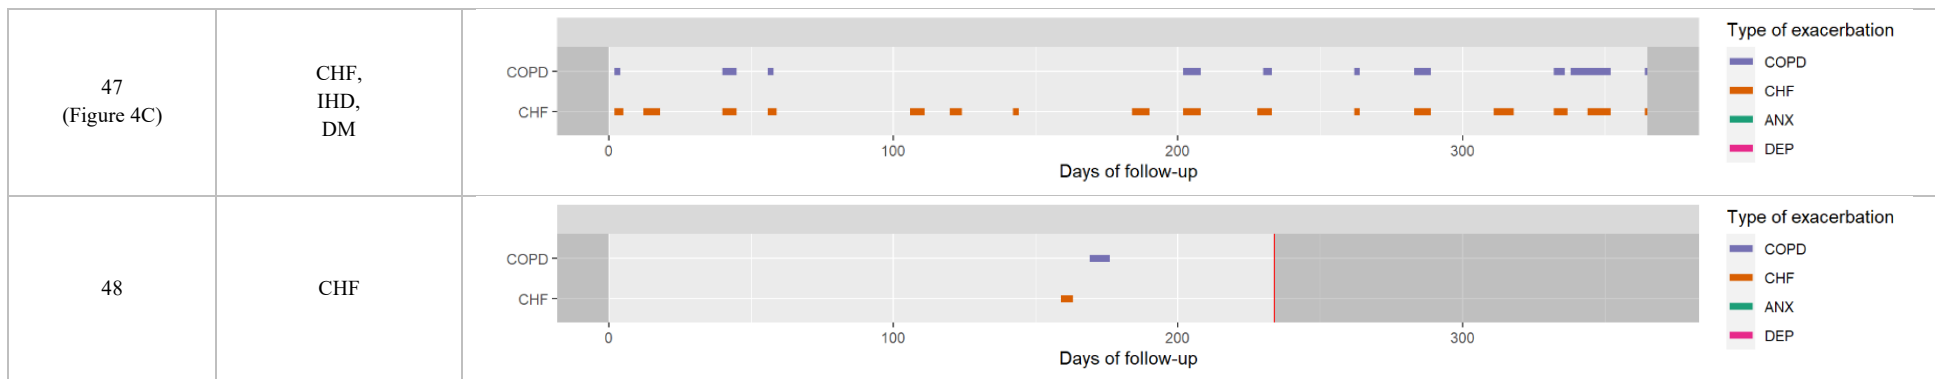

Abbreviations: AECOPD: acute exacerbation of chronic obstructive pulmonary disease; COPD: chronic obstructive pulmonary disease; CHF: chronic heart failure; ANX: anxiety; DEP: depression; IHD: ischemic heart disease; DM: diabetes mellitus
